# Supplementary material
Source: PubMed Central journal article supplement (PMC4059891)

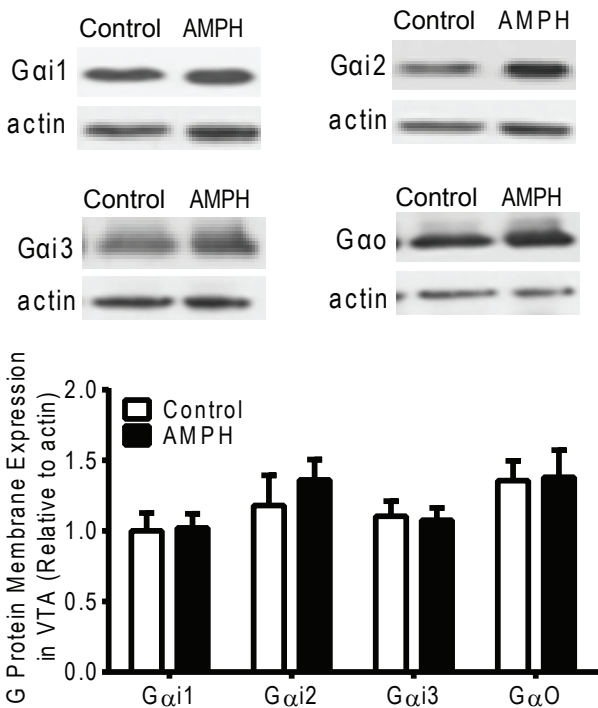

Figure S1

Supplement: npp201430x1.pdf [file npp201430x1.pdf]

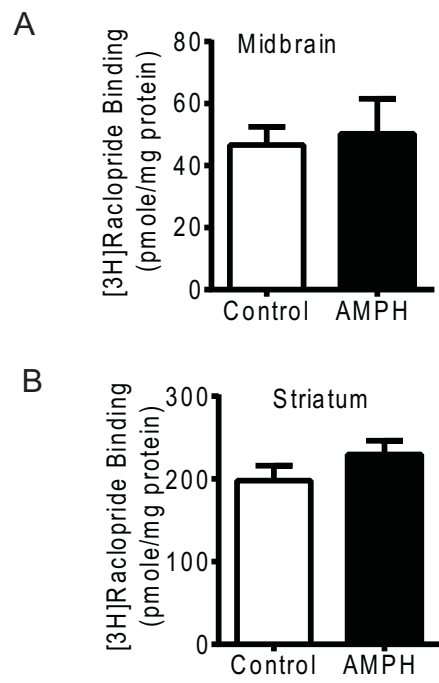

Figure S2

Supplement: npp201430x2.pdf [file npp201430x2.pdf]

RGS2

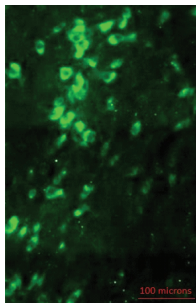

TH

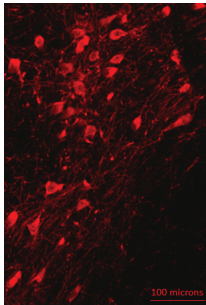

Overlay

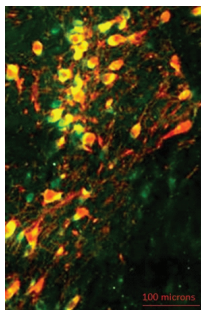

Figure S3

Supplement: npp201430x3.pdf [file npp201430x3.pdf]
